# Supplementary material
Source: publisher site journal article supplement (https://www.dovepress.com/article/456712)
Supplement: Supplementary file 1 [file Supplementary%20Materials_1.docx]

**Supplementary Materials**

**Supplementary Table S1.** Comparison of Baseline Data between Regorafenib Group and Regorafenib-PD-1 Group in the Overall Population.

| Characteristics | Overall  （n=288） | Regorafenib  （n=121） | Regorafenib-PD-1  （n=167） | P value |
| --- | --- | --- | --- | --- |
| Gender, n (%) |  |  |  | 0.973 |
| Female | 30 (10.4%) | 12 (9.9%) | 18 (10.8%) |  |
| Male | 258 (89.6%) | 109 (90.1%) | 149 (89.2%) |  |
| Age, mean ± sd | 56.431 ± 9.5517 | 57.198 ± 9.6933 | 55.874 ± 9.4379 | 0.510 |
| ECOG, n (%) |  |  |  | 0.993 |
| 0 | 101 (35.1%) | 42 (34.7%) | 59 (35.3%) |  |
| 1 | 129 (44.8%) | 53 (43.8%) | 76 (45.5%) |  |
| 2 | 58 (20.1%) | 26 (21.5%) | 32 (19.2%) |  |
| Types of Infectious Viruses, n (%) |  |  |  | 0.860 |
| HBV | 256 (88.9%) | 109 (90.1%) | 147 (88%) |  |
| HCV | 32 (11.1%) | 12 (9.9%) | 20 (12%) |  |
| child-pugh grade, n (%) |  |  |  | 0.913 |
| A | 160 (55.6%) | 69 (57%) | 91 (54.5%) |  |
| B | 128 (44.4%) | 52 (43%) | 76 (45.5%) |  |
| ALBI score, median (IQR) | -2.1298 (-2.4016,-1.7326) | -2.025  (-2.3477, -1.6538) | -2.1798  (-2.502, -1.7705) | 0.172 |
| ALBI grade, n (%) |  |  |  | 0.542 |
| 1 | 44 (15.3%) | 14 (11.6%) | 30 (18%) |  |
| 2 | 213 (74%) | 91 (75.2%) | 122 (73.1%) |  |
| 3 | 31 (10.8%) | 16 (13.2%) | 15 (9%) |  |
| BCLC stage, n (%) |  |  |  | 0.952 |
| A | 7 (2.4%) | 4 (3.3%) | 3 (1.8%) |  |
| B | 53 (18.5%) | 22 (18.3%) | 31 (18.6%) |  |
| C | 227 (79.1%) | 94 (78.3%) | 133 (79.6%) |  |
| AFP, n (%) |  |  |  | 1.000 |
| < 400 ng/mL | 181 (62.8%) | 76 (62.8%) | 105 (62.9%) |  |
| ≥ 400 ng/mL | 107 (37.2%) | 45 (37.2%) | 62 (37.1%) |  |
| Albumin (g/L), mean ± sd | 35.463 ± 4.5159 | 35.12 ± 4.1349 | 35.711 ± 4.7699 | 0.548 |
| Total bilirubin (μmol/L), median (IQR) | 15.3 (11.8, 22.85) | 17.1 (11.3, 26.4) | 15.1 (11.8, 20.75) | 0.423 |
| Cirrhosis, n (%) |  |  |  | 0.976 |
| No | 42 (14.6%) | 17 (14%) | 25 (15%) |  |
| Yes | 246 (85.4%) | 104 (86%) | 142 (85%) |  |
| Ascites, n (%) |  |  |  | 0.400 |
| No | 106 (36.8%) | 50 (41.3%) | 56 (33.5%) |  |
| Yes | 182 (63.2%) | 71 (58.7%) | 111 (66.5%) |  |
| Macrovascular invasion, n (%) |  |  |  | 0.505 |
| No | 155 (53.8%) | 70 (57.9%) | 85 (50.9%) |  |
| Yes | 133 (46.2%) | 51 (42.1%) | 82 (49.1%) |  |
| Extrahepatic metastasis, n (%) |  |  |  | 0.255 |
| No | 167 (58%) | 77 (63.6%) | 90 (53.9%) |  |
| Yes | 121 (42%) | 44 (36.4%) | 77 (46.1%) |  |
| With surgery/RFA/MWA/SBRT in first-­line treatment, n (%) |  |  |  | 0.374 |
| No | 152 (52.8%) | 58 (47.9%) | 94 (56.3%) |  |
| Yes | 136 (47.2%) | 63 (52.1%) | 73 (43.7%) |  |
| With HAIC/TACE in first-line treatment, n (%) |  |  |  | 0.130 |
| No | 47 (16.3%) | 26 (21.5%) | 21 (12.6%) |  |
| Yes | 241 (83.7%) | 95 (78.5%) | 146 (87.4%) |  |
| Locoregional treatment in second­line treatment, n (%) |  |  |  | 0.897 |
| No | 162 (56.2%) | 70 (57.9%) | 92 (55.1%) |  |
| Yes | 126 (43.8%) | 51 (42.1%) | 75 (44.9%) |  |
| Starting dose of Reg, n (%) |  |  |  | 0.951 |
| 80mg | 27 (9.4%) | 10 (8.3%) | 17 (10.2%) |  |
| 120mg | 70 (24.3%) | 32 (26.4%) | 38 (22.8%) |  |
| 160mg | 191 (66.3%) | 79 (65.3%) | 112 (67.1%) |  |

**C**

**Supplementary Table S2.** presents both univariate and multivariate analyses of factors linked to progression-free survival (PFS) within the Pre-Combination Therapy cohort.

| Characteristics | Total(N) | Univariate analysis | | Multivariate analysis | |
| --- | --- | --- | --- | --- | --- |
| Hazard ratio (95% CI) | P value | Hazard ratio (95% CI) | P value |
| second-line treatment regimen | 162 |  |  |  |  |
| Regorafenib | 59 | Reference |  | Reference |  |
| Regorafenib-PD-1 | 103 | 0.683 (0.457 - 1.021) | 0.063 | 0.670 (0.447 - 1.005) | 0.053 |
| Gender | 162 |  |  |  |  |
| Female | 15 | Reference |  |  |  |
| Male | 147 | 0.871 (0.422 - 1.795) | 0.707 |  |  |
| Age | 162 | 0.988 (0.968 - 1.008) | 0.241 |  |  |
| ECOG PS | 162 |  |  |  |  |
| 0 | 54 | Reference |  |  |  |
| 1 | 72 | 1.273 (0.820 - 1.978) | 0.283 |  |  |
| 2 | 36 | 1.004 (0.565 - 1.784) | 0.990 |  |  |
| Types of Infectious Viruses | 162 |  |  |  |  |
| HBV | 18 | Reference |  |  |  |
| HCV | 144 | 0.885 (0.484 - 1.620) | 0.693 |  |  |
| child-pugh grade | 162 |  |  |  |  |
| A | 85 | Reference |  |  |  |
| B | 77 | 0.749 (0.503 - 1.115) | 0.154 |  |  |
| ALBI score | 162 | 1.001 (0.680 - 1.474) | 0.996 |  |  |
| ALBI grade | 162 |  |  |  |  |
| 1 | 19 | Reference |  |  |  |
| 2 | 123 | 1.096 (0.608 - 1.977) | 0.759 |  |  |
| 3 | 20 | 1.212 (0.542 - 2.709) | 0.639 |  |  |
| BCLC stage | 162 |  |  |  |  |
| A | 3 | Reference |  |  |  |
| B | 27 | 0.492 (0.142 - 1.699) | 0.262 |  |  |
| C | 132 | 0.642 (0.202 - 2.042) | 0.453 |  |  |
| AFP | 162 |  |  |  |  |
| < 400 ng/mL | 102 | Reference |  |  |  |
| ≥ 400 ng/mL | 60 | 1.140 (0.760 - 1.711) | 0.527 |  |  |
| Albumin | 162 | 1.010 (0.967 - 1.055) | 0.650 |  |  |
| Total bilirubin | 162 | 1.003 (0.993 - 1.014) | 0.548 |  |  |
| Cirrhosis | 162 |  |  |  |  |
| No | 22 | Reference |  |  |  |
| Yes | 140 | 1.014 (0.566 - 1.816) | 0.963 |  |  |
| Ascites | 162 |  |  |  |  |
| No | 60 | Reference |  | Reference |  |
| Yes | 102 | 0.660 (0.445 - 0.979) | **0.039** | 0.617 (0.413 - 0.921) | **0.018** |
| Macrovascular invasion | 162 |  |  |  |  |
| No | 83 | Reference |  |  |  |
| Yes | 79 | 0.957 (0.647 - 1.415) | 0.826 |  |  |
| Extrahepatic disease | 162 |  |  |  |  |
| No | 90 | Reference |  |  |  |
| Yes | 72 | 1.181 (0.798 - 1.748) | 0.405 |  |  |
| With surgery/RFA/MWA/SBRT | 162 |  |  |  |  |
| No | 72 | Reference |  | Reference |  |
| Yes | 90 | 0.629 (0.426 - 0.930) | **0.020** | 0.563 (0.378 - 0.840) | **0.005** |
| With HAIC/TACE | 162 |  |  |  |  |
| No | 24 | Reference |  |  |  |
| Yes | 138 | 0.845 (0.495 - 1.443) | 0.538 |  |  |
| Locoregional treatment in second-­line treatment | 162 |  |  |  |  |
| No | 84 | Reference |  |  |  |
| Yes | 78 | 0.967 (0.654 - 1.430) | 0.868 |  |  |
| Starting dose of Rego | 162 |  |  |  |  |
| 80mg | 18 | Reference |  |  |  |
| 120mg | 38 | 1.627 (0.749 - 3.537) | 0.219 |  |  |
| 160mg | 106 | 1.839 (0.918 - 3.684) | 0.086 |  |  |
